# Supplementary material for: Silsesquioxane-Polythiophene Hybrid Copolymer as an Efficient Modifier for Single-Walled Carbon Nanotubes
Source: Hindawi journal article supplement (doi:10.1155/2020/7659405), 2020-03-11
Supplement: f1 [file 7659405.f1.docx]

Supporting Information

Silsesquioxane−Polythiophene Hybrid copolymer as an efficient modifier for single-walled carbon nanotubes

Shuxi Gao ****, Xiaoyong Hu *1*, Lei Zhang, Yuliang Mai, Hao Pang, Yongqiang Dai, Fang Lu, Bin Liao ***

*Guangdong Provincial Key Laboratory of Industrial Surfactant, Guangdong Research Institute of Petrochemical and Fine Chemical Engineering, Guangzhou 510000, Guangdong P. R. China*

** Corresponding author.*

*** Corresponding author. E-mail:* [*gaoshuxi@163.com*](mailto:gaoshuxi@163.com)

*1Shuxi Gao and Xiaoyong Hu contributed equally to this work.*

Content

[1. Experimental 3](#_Toc20646626)

[1.1 Synthesis processes 3](#_Toc20646627)

[1.1.1 Synthesis of S-1-dodecyl-S’-(R, R’-dimethyl-R’’-acetic acid)trithiocarbonate (DTTC) and S-1-dodecyl-S’-(R, R’-dimethyl-R’’- (2-Thienyl) ethyl acetate)trithiocarbonate (DTTC-Th) 3](#_Toc20646628)

[1.1.2 Synthesis of functionalized T10 containing thiophene rings (T10(5-5)) 4](#_Toc20646629)

[1.1.3 Synthesis of linear copolymer PDMA-*b*-PMA 5](#_Toc20646630)

[1.1.4 Synthesis of linear copolymer PDMA-*b*-PMA-Th 7](#_Toc20646631)

[1.1.5 Synthesis of T10-(PDMA-*b*-PMA)-Th copolymer precursor (M5-5) 8](#_Toc20646632)

[1.1.6 Synthesis of the star-shaped conjugated copolymer T10-(PDMA-*b*-PMA)-PEDOT (P5-5) and the linear analogue PDMA-*b*-PMA-*b*-PEDOT 9](#_Toc20646633)

[1.2 General Procedure for obtaining the pristine SWNTs, SWNTs dispersion, modified SWNTs and supernatant liquid 11](#_Toc20646634)

[1.3 Synthesized of PEDOT homopolymer by interfacial polymerization 12](#_Toc20646635)

[2.Additional Results 13](#_Toc20646636)

[References 14](#_Toc20646637)

# 1. Experimental

## 1.1 Synthesis processes

### 1.1.1 Synthesis of S-1-dodecyl-S’-(R, R’-dimethyl-R’’-acetic acid)trithiocarbonate (DTTC) and S-1-dodecyl-S’-(R, R’-dimethyl-R’’- (2-Thienyl) ethyl acetate)trithiocarbonate (DTTC-Th)

S-1-dodecyl-S’-(R, R’-dimethyl-R’’-acetic acid)trithiocarbonate (DTTC) was prepared following the steps in Ref. 1 [1].

FTIR (KBr, *ν*max/cm-1): 1727 (C=O).

1H NMR (CDCl3, *δ*/ppm): 0.85 (t, 3H), 1.20~1.40 (m, 18H), 1.59~1.69 (m, 2H), 1.69 (s, 6H), 3.24 (t, 2H).


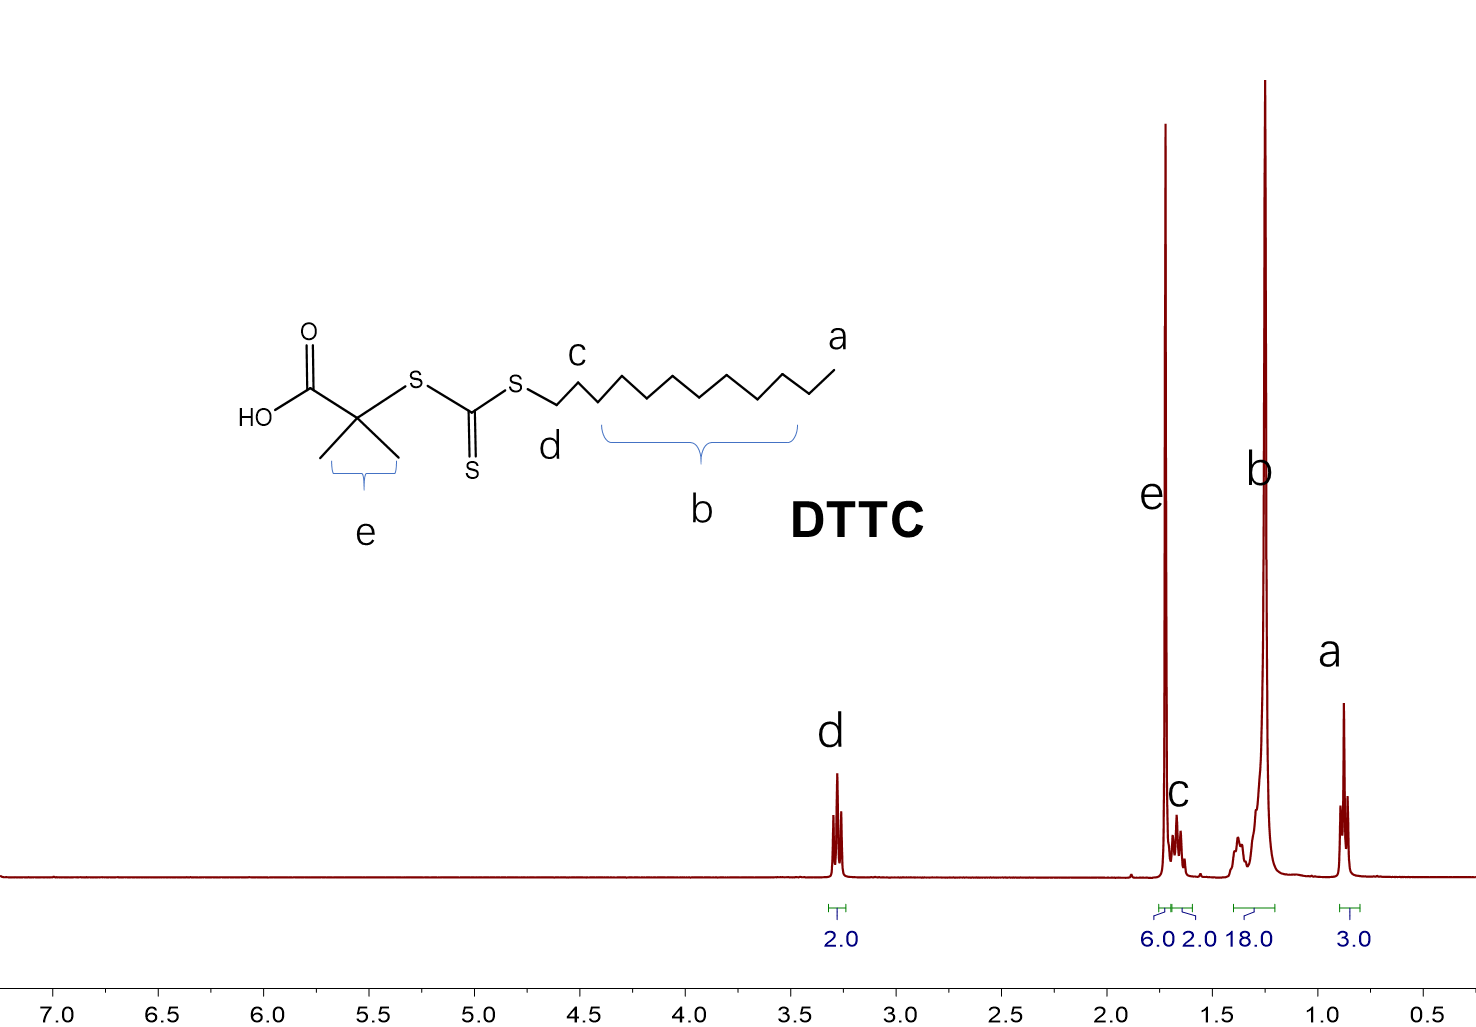


Figure S1. 1H NMR of DTTC

2-Thiopheneethanol (0.9216g, 7.2mmol), DTTC (2.184g, 6mmol), N,N′-Dicyclohexylcarbodiimide (DCC, 1.4832g, 7.2mmol), 4-Dimethylaminopyridine (DMAP，0.0732g, 6mmol) were dissolved in dry tetrahydrofuran (THF, 5 mL) in Schlenk tube. The tube was quickly subjected to three freeze-pump-thaw cycles and stirred during 24 hours at 25 oC. Next, the crude mixture was concentrated after passing a filtration. Then, Purification of the crude mixture by column chromatography (silicagel, ethyl acetate/petroleum ether=1:25) yielded the DTTC-Th (1.8853g, 3.98mmol, 66%, C23H38O2S4, 474g/moL) as yellow oil. The final product was dried at room temperature in a vacuum oven for 48h.

FTIR (KBr, *ν*max/cm-1): 818 and 891 (C-S in the thiophene ring), 1379 and 1495 (C-S and C=C in the thiophene ring), 1058 (C=S), 1293 (C-S-C), 1707 (C=O).

1H NMR(CDCl3, *δ*/ppm): 0.87 (t, 3H), 1.22~1.36 (m, 18H), 1.59~1.64 (m, 2H), 1.69 (s, 6H), 3.15(t, 2H), 3.24 (t, 2H), 4.31 (t, 2H), 6.85 (d, 1H), 6.91 (t, 1H), 7.14(d, 1H).

**
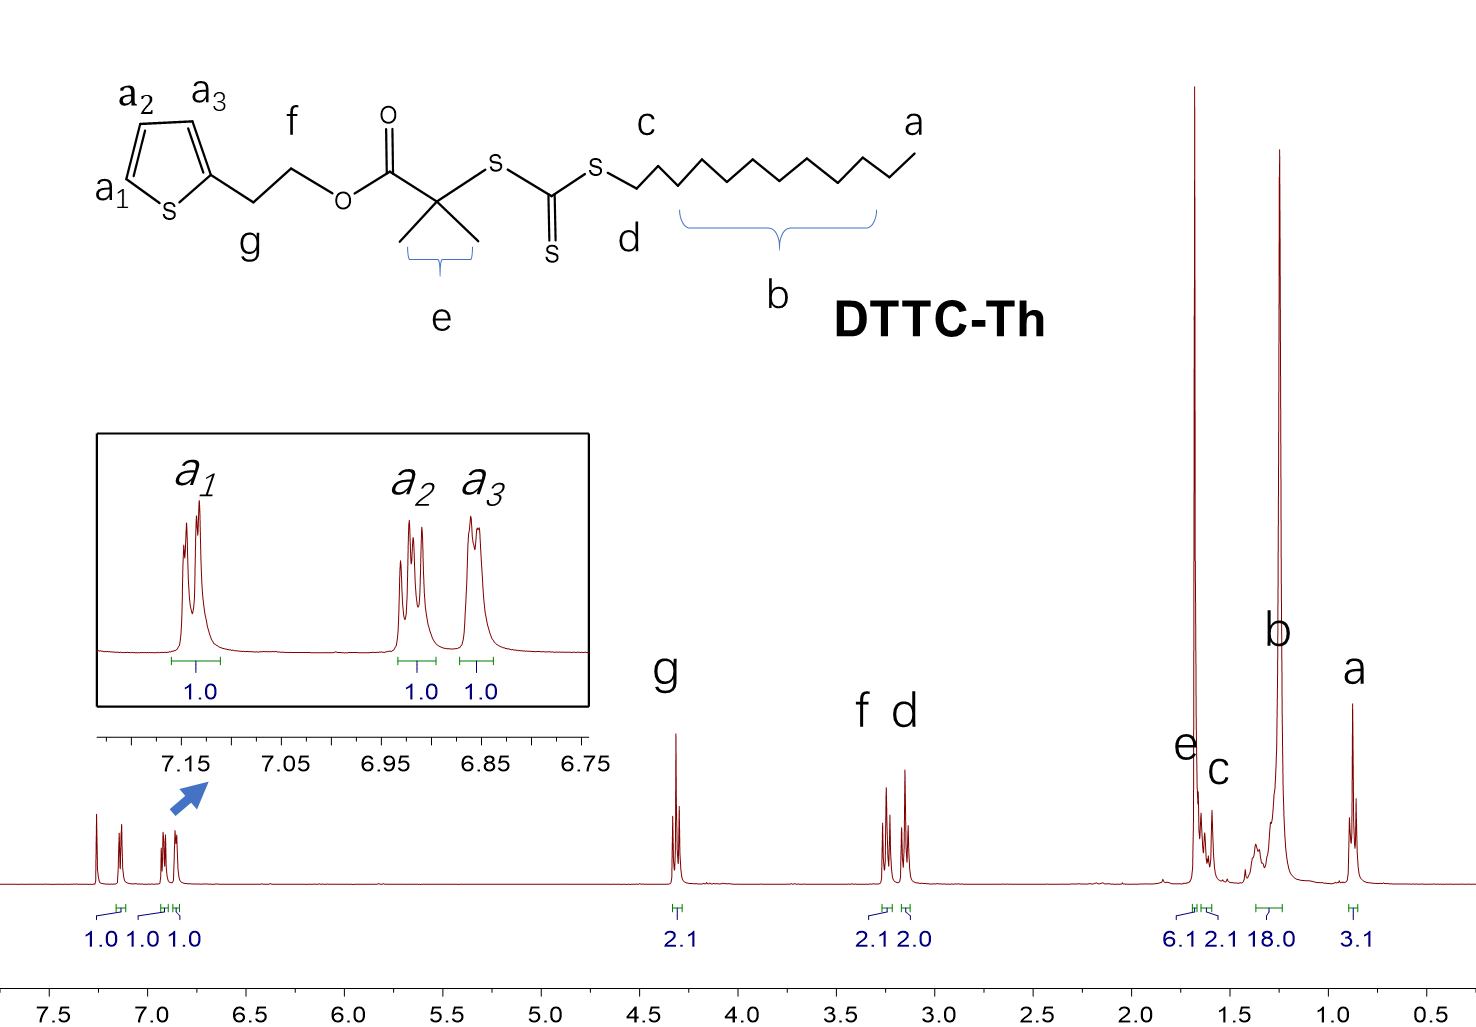
**

Figure S2. 1H NMR of DTTC-Th

### 1.1.2 Synthesis of functionalized T10 containing thiophene rings (T10(5-5))

DL-N-acetylhomocysteine thiolactone (ACTA, 1.908 g, 12 mmol) and 4-dimethylaminopyridine (DMAP, 0.0732 g, 0.6 mmol) were dissolved in dry 1, 4-dioxane (18 mL) in Schlenk tube, and the resulting solution was purged with nitrogen for 30 min, with subsequent addition of 2-thiopheneethylamine (TPEA, 0.762 g, 6 mmol). After the addition, the tube was quickly subjected to three freeze-pump-thaw cycles followed stirring for 8 hours at 40 °C.

Next, degassed **T10**/1, 4-dioxane solution (2.1492 g/5 mL, 0.24 mmol/mL) was injected into the tube via a syringe and the reaction solution was stirred at 40 °C for 14 hours. After the solvent was pumped out, the obtained viscous liquid was washed with deionized water under vigorous stirring three times and dissolved in dichloromethane (20 mL), the resulting solution was further purified from traces of water by passing over 4A molecular sieve and concentrated.

Finally, **T10(5-5)** (1.2 g, 31%) was obtained as faint yellow viscous liquid after purification by flash chromatography (4:1 petroleum ether/ethyl acetate), and dried at room temperature in a vacuum oven for 48 h, verified by FTIR, 1H NMR, MALDI-TOF.

FTIR (KBr, *ν*max/cm−1): 693 and 820 (C−S in the thiophene ring), 1120 (O−Si−O), 1200 (C−O−C), 1377 (C=C in the thiophene ring), 1439 (C−S−C), 1543(C−N), 1636(C=C), 1653 (O=C−NH), 1720 (C=O), 3072 (C−H in olefin), 3287 (N−H).

1H NMR(CDCl3, *δ*/ppm): 0.57−0.89 (m, 20H), 1.15−1.25 (m, 10H), 1.49−1.79 (m, 20H), 1.90 (s, 15H), 1.96(d, 15H), 2.05 (s, 15H), 2.31−2.81 (m, 20H), 2.85−3.10 (m, 15H), 3.18−3.67 (m, 20H), 4.00−4.10 (m, 10H), 4.48−4.58 (m, 5H), 5.46−6.20 (d, 10H), 6.82(m, 5H), 6.92 (m, 5H), 7.15(m, 5H). *M*n, NMR=3223 g/mol.

MS (MALDI-TOF, m/z): calculated for (C12H18N2O2S2)5(C7H11O2)10(SiO1.5)10 [*M*r·H]+: 3224.10 Da, Found:3224.42 Da.

**
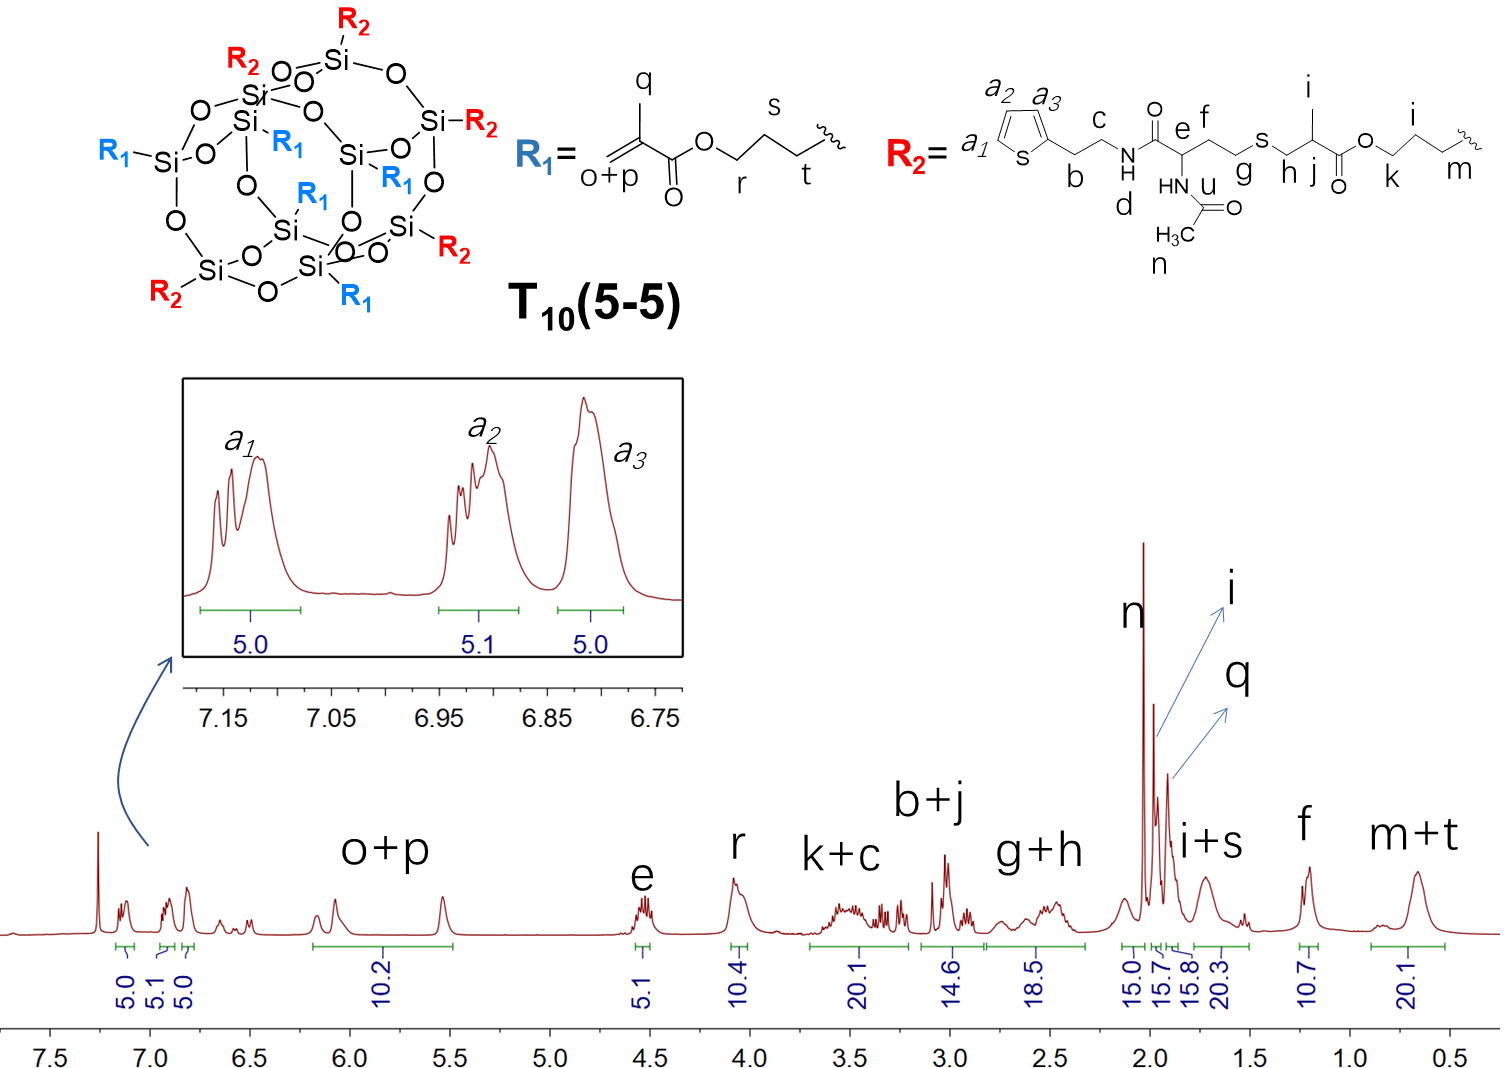
**

Figure S3. 1H NMR of T10(5-5)

### 1.1.3 Synthesis of linear copolymer PDMA-*b*-PMA

N, N-(dimethylamine)ethyl methacrylate (DMA, 15.7g, 0.1 mol), DTTC (0.364 g, 1 mmol), 2, 2-azobisisobutyronitrile (AIBN, 0.0164g, 0.1 mmol) were dissolved in dry 1, 4-dioxane (10 mL) in Schlenk tube, and the resulting solution was quickly subjected to three freeze-pump-thaw cycles, with subsequent stirring for 4 h at 70 °C. The flask was frozen in liquid nitrogen to terminate the polymerization and thawing in warm water (50 oC). Subsequently, the reaction mixture was precipitated in a large excess of petroleum ether and isolated by centrifugation. The precipitation was dissolved in THF (20 mL), and the resulting solution was purified by dialysis against THF for 1 days. Then, THF was pumped out, and a yellow solid (PDMA, 9.5 g, 61%) was obtained by drying 48 h at 30 oC in vacuo.

PDMA (8.5 g, 0.6 mmol), methacrylate (MA, 2.58g, 0.03 mol), AIBN (0.0164 g, 0.1 mmol) were dissolved in dry 1, 4-dioxane (36 mL) in Schlenk tube, and the resulting solution was quickly subjected to three freeze-pump-thaw cycles, with stirring for 4 h at 70 oC. The flask was frozen in liquid nitrogen to terminate the polymerization and thawed in warm water. Subsequently, the reaction mixture was precipitated in a large excess of petroleum ether and isolated by centrifugation. The precipitate was then dissolved in THF (20mL), and the resulting solution was purified by dialysis against THF for 2 days. After pumping out the solvent, a yellow solid (PDMA-*b*-MA, 6.0 g, 65%) was obtained by drying 48 h at 30 oC in vacuo.

SEC: *M*n, SEC=13.9 kg/mol, *M*w, SEC=17.4 kg/mol, PDI=1.25.

FTIR (KBr, *ν*max/cm−1): 1152 (C−O−C), 1723 (C=O).

1H NMR (CDCl3, *δ*/ppm): 3.76−4.42 (m, 180H), 3.61−3.69 (s, 27H), 3.25−3.39 (t, 2H), 2.51−2.63 (m, 183H), 2.20 (s, 540H), 1.58−2.12 (m, 180H), 0.70−1.21 (s, 272H).

(1)

**
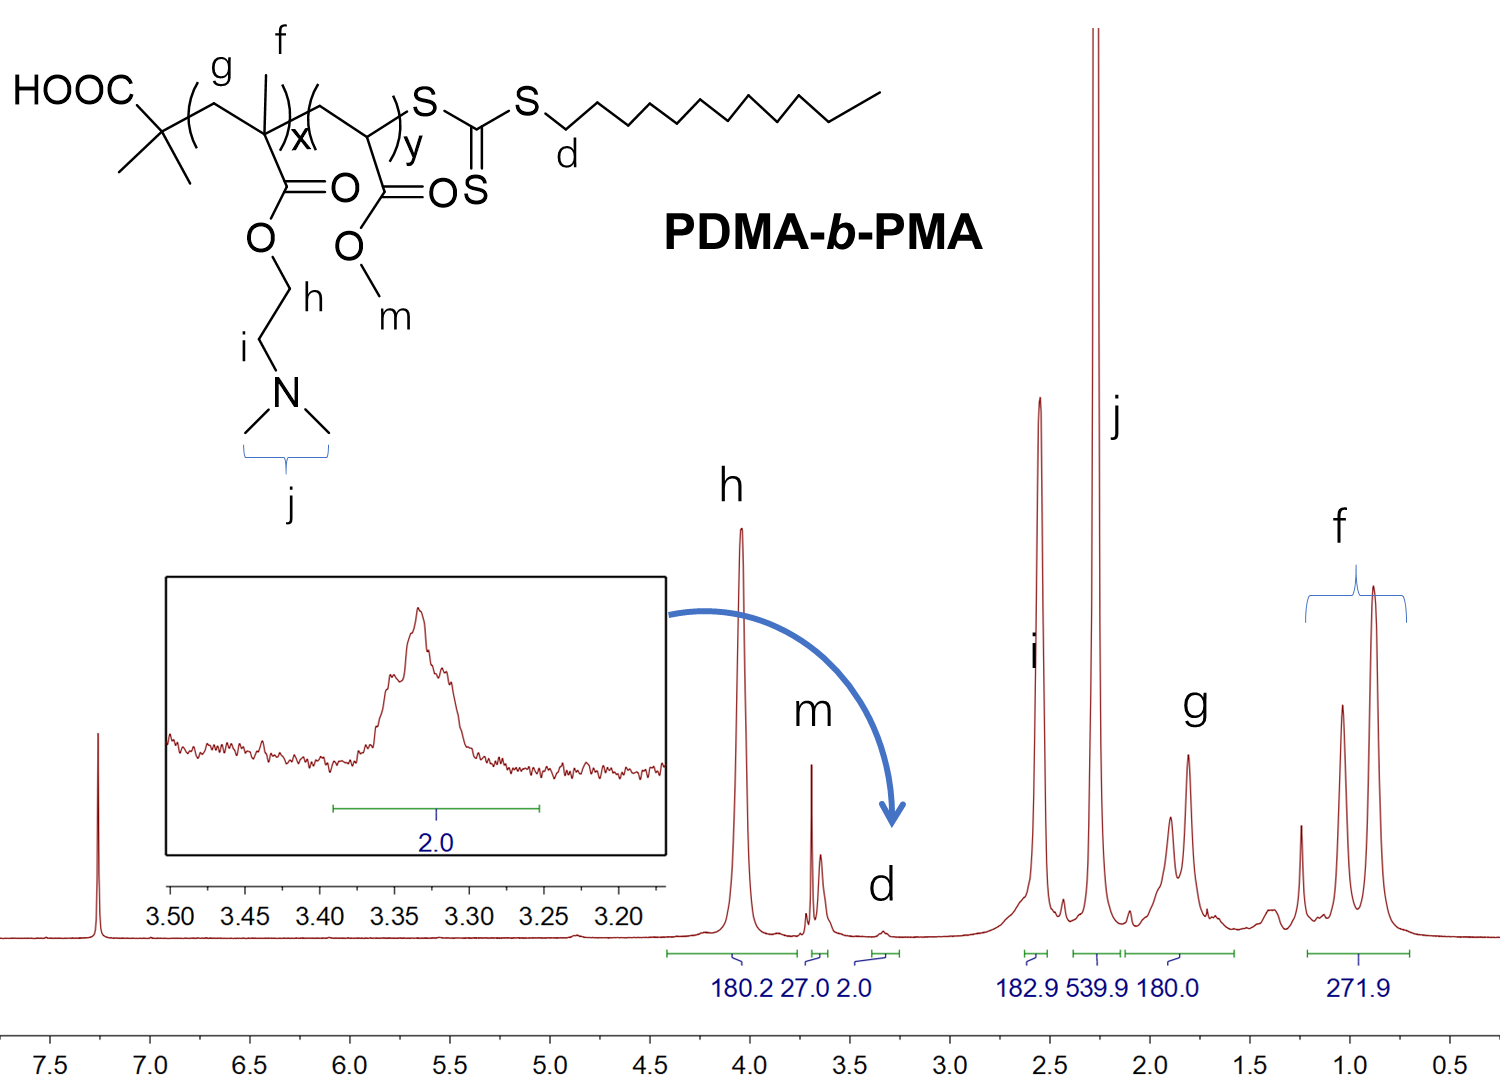
**

Figure S4. 1H NMR of PDMA-*b*-PMA

### 1.1.4 Synthesis of linear copolymer PDMA-*b*-PMA-Th

*Macromolecular RAFT agent (PDMA-Th).* DMA (15.7g, 0.1 mol), DTTC-Th (0.474 g, 1 mmol), AIBN (0.0164g, 0.1 mmol) were dissolved in dry 1, 4-dioxane (10 mL) in Schlenk tube, and the resulting solution was quickly subjected to three freeze-pump-thaw cycles, with subsequent stirring for 4 h at 70 °C. The flask was frozen in liquid nitrogen to terminate the polymerization and thawing in warm water (50 oC). Subsequently, the reaction mixture was precipitated in a large excess of petroleum ether and isolated by centrifugation. The precipitation was dissolved in THF (20 mL), and the resulting solution was purified by dialysis against THF for 1 days. Then, THF was pumped out, and a yellow solid (PDMA-Th, 10.0 g, 65%) was obtained by drying 48 h at 30 oC in vacuo.

PDMA-Th (10.0 g, 0.6 mmol), methacrylate (MA, 2.58g, 0.03 mol), AIBN (0.0164 g, 0.1 mmol) were dissolved in dry 1, 4-dioxane (36 mL) in Schlenk tube, and the resulting solution was quickly subjected to three freeze-pump-thaw cycles, with stirring for 4 h at 70 oC. The flask was frozen in liquid nitrogen to terminate the polymerization and thawed in warm water. Subsequently, the reaction mixture was precipitated in a large excess of petroleum ether and isolated by centrifugation. The precipitate was then dissolved in THF (20mL), and the resulting solution was purified by dialysis against THF for 2 days. After pumping out the solvent, a yellow solid (PDMA-*b*-MA-Th, 7.0 g, 70%) was obtained by drying 48 h at 30 oC in vacuo.

SEC: *M*n, SEC=16.1 kg/mol, *M*w, SEC=20.5 kg/mol, PDI=1.27.

FTIR (KBr, *ν*max/cm−1): 1151 (C−O−C), 1721 (C=O).

1H NMR (CDCl3, *δ*/ppm): 6.82 (m, 1H), 6.90 (m, 1H), 7.10 (m, 1H), 3.96−4.14 (m, 230H), 3.61−3.70(s, 39H), 3.28−3.34 (t, 2H), 3.09−3.14 (t, 2H), 2.52−2.63 (m, 233H), 2.28 (s, 698H), 0.72−1.2 (s, 347H).

(2)

**
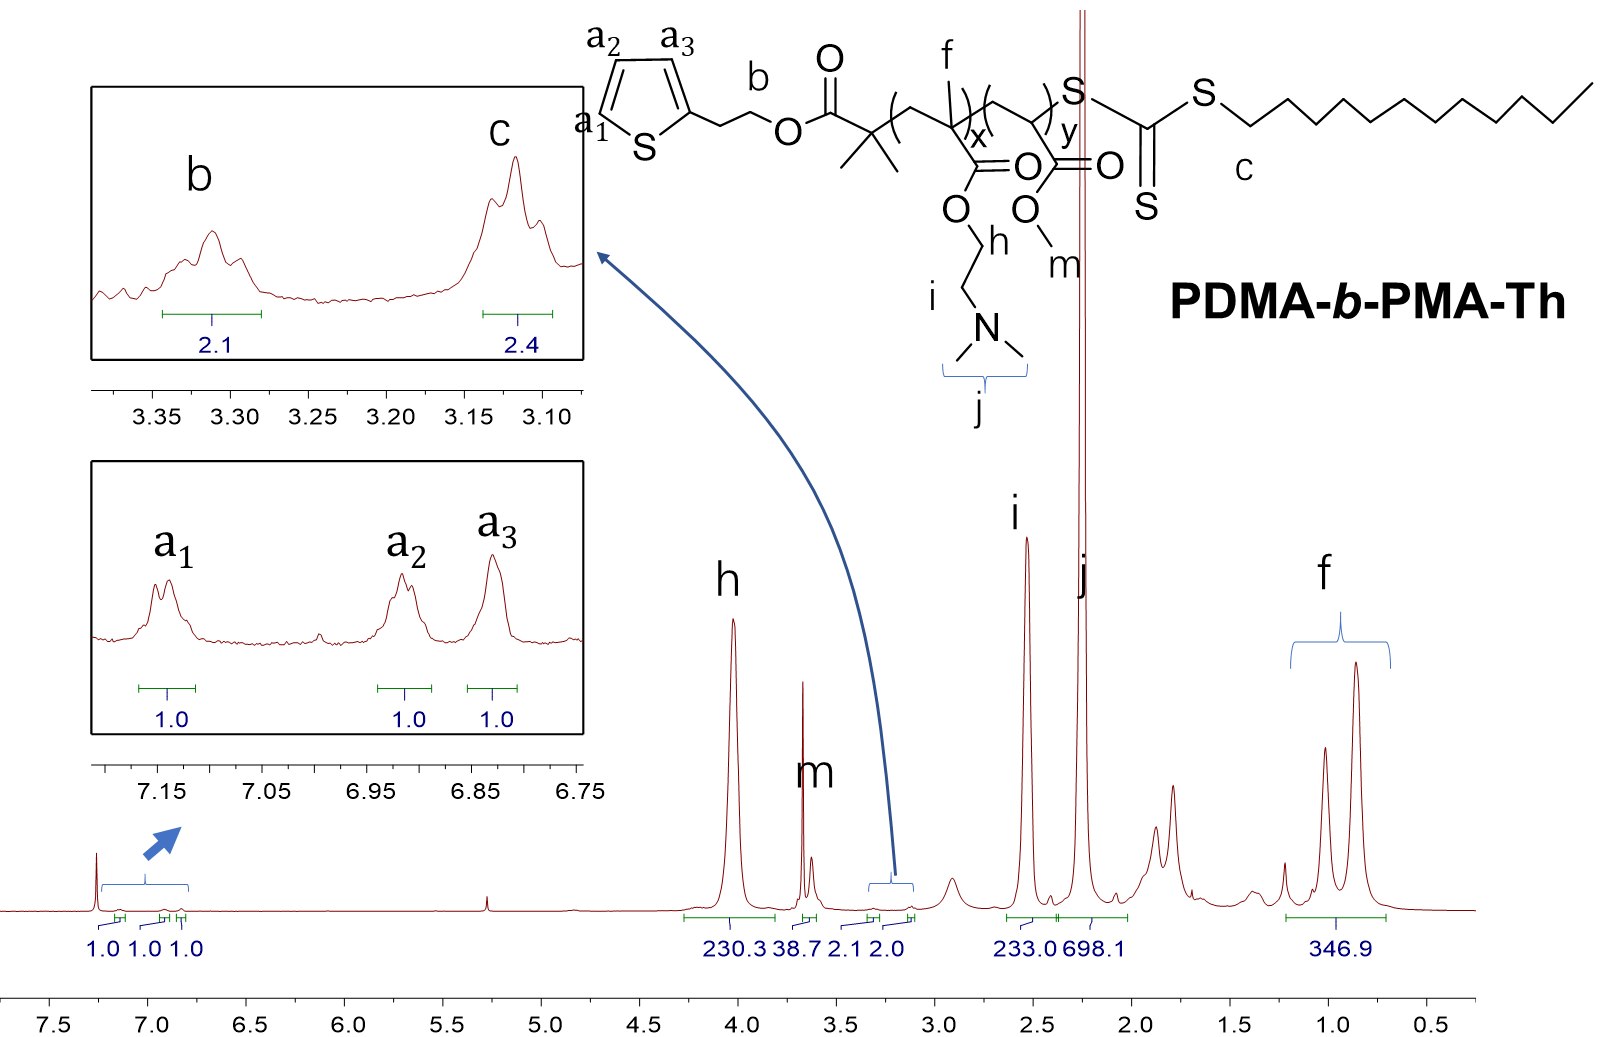
**

Figure S5. 1H NMR of PDMA-*b*-PMA-Th

### 1.1.5 Synthesis of T10-(PDMA-*b*-PMA)-Th copolymer precursor (M5-5)

*The flexible arm PDMA-b-MA was achieved via reversible addition–fragmentation transfer (RAFT) polymerization, regulated by the RAFT agent DTTC.*

PDMA-*b*-MA solution was prepared by dissolving PDMA-*b*-MA (7.5 g, 0.5 mmol) in dry 1, 4-dioxane (36 mL) in Schlenk tube, and the solution was quickly subjected to three freeze-pump-thaw cycles. Then, propylamine (PA, 0.411 mL, 5 mmol), Tri-N-butylphosphine (PBu3, 1.04 mL, 5 mmol) were injected by syringe under argon atmosphere into the solution, and the mixture was degassed by three freeze-pump-thaw cycles again. The reaction was executed for 4 hours at 40 oC under stirring. Subsequently, the solvent removal process was executed to remove unreacted PA for 2 times

Next, degassed T10(5-5)/TEA/dioxane solution, which was prepared by dissolving T10(5-5) (0.3221g, 0.1 mmol) and triethylamine (TEA, 0.505 mL, 5 mmol) in deoxidized 1, 4-dioxane (30 mL), was injected into the tube under argon atmosphere and the reaction was carried out for 24 h at 40 oC under stirring. After solvent removal process, the mixture was redissolved in CH2Cl2 (10 mL) and precipitated in cold diethyl ether/petroleum ether (180 mL, V/V=1/5) under magnetic stirring. The precipitate was filtered off, dissolved in THF (20 mL), and the resulting solution was purified by dialysis against THF for 2 days. Then, THF was pumped out, and a faintly yellow solid (M5-5, 5.5 g, 75%) was obtained by drying 48 h at 30 oC in vacuo.

SEC: *M*n, SEC=37.4 kg/mol, *M*w, SEC=80.5 kg/mol, PDI=2.15.

FTIR (KBr, *ν*max/cm−1): 1151(C−O−C), 1653 (O=C−NH), 1725 (C=O), 3259 (N−H).

1H NMR (CDCl3, *δ*/ppm): 6.82 (m, 5H), 6.90 (m, 5H), 7.10 (m, 5H), 3.42−3.70 (m, 135H), 3.71−4.20 (s, 907H), 2.51−2.64 (s, 908H)

(3)

**
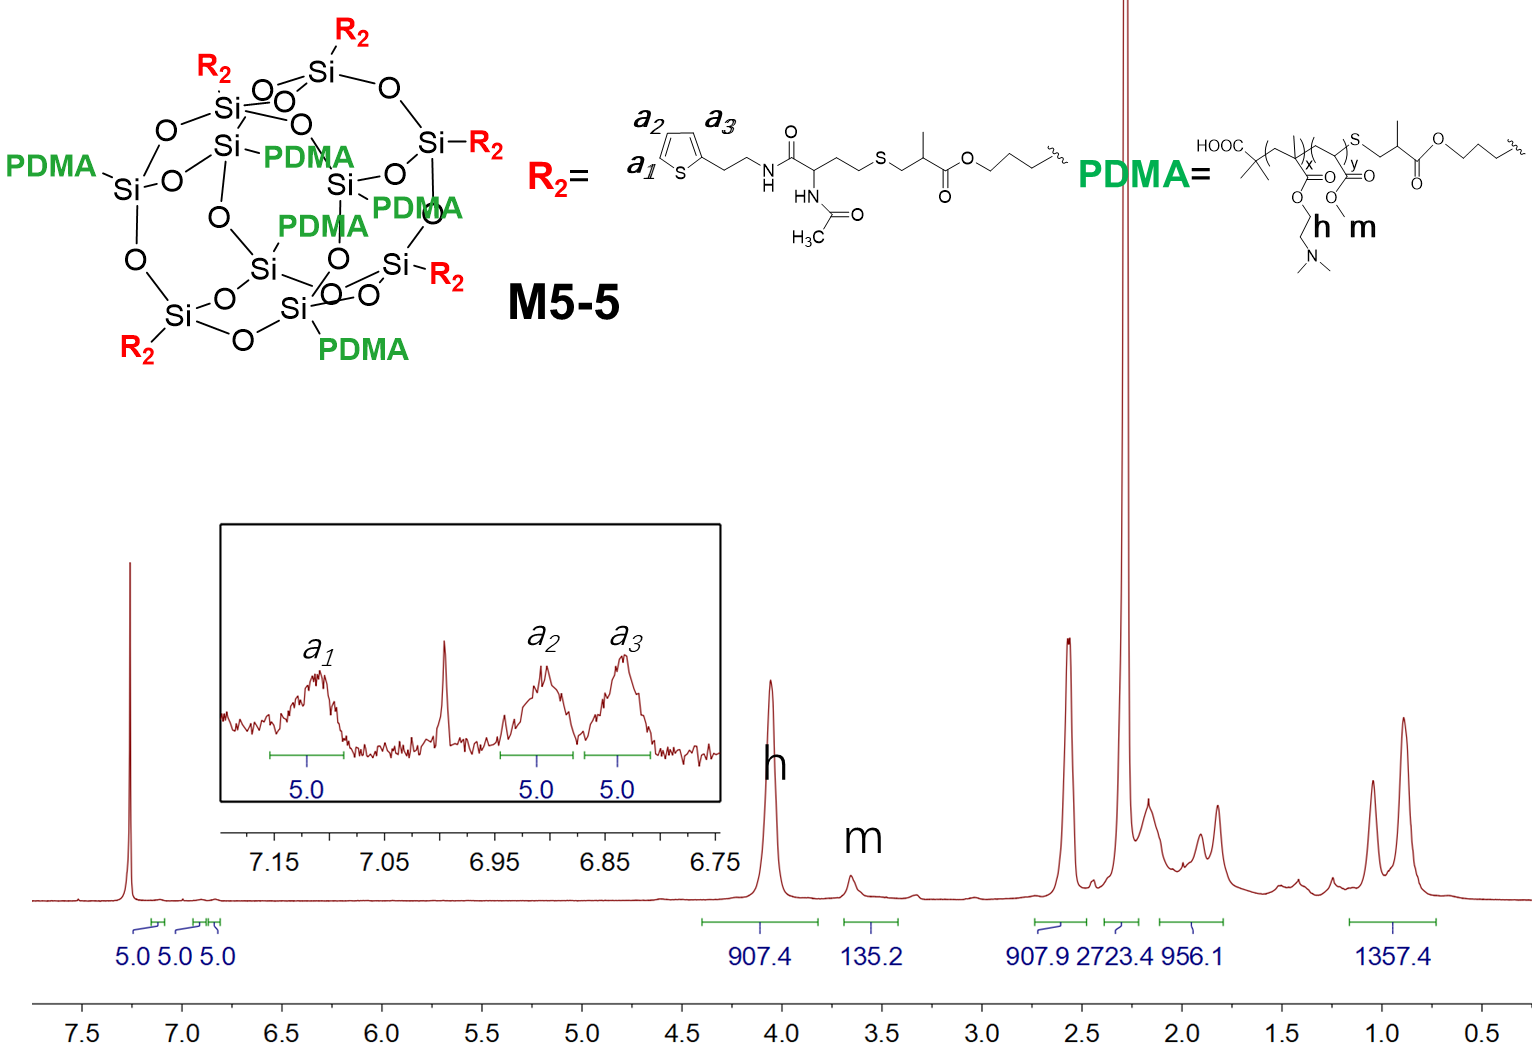
**

Figure S6. 1H NMR of M5-5

### 1.1.6 Synthesis of the star-shaped conjugated copolymer T10-(PDMA-*b*-PMA)-PEDOT (P5-5) and the linear analogue PDMA-*b*-PMA-*b*-PEDOT

M5-5 (0.1 g, 1.3×10−3 mmol) (or PDMA-*b*-PMA-Th (0.1 g, 5×10−3 mmol)) was dissolved in HCl solution (3.5 mL, 1 mol/L), FeCl3 aqueous solution (1.5 mL, 0.1 mol/L) was added as catalyst, and tetrahydrofuran (THF, 0.5 mL) was injected to promote the emulsification of copolymer precursor. 3, 4-ethylenedioxythiophene (EDOT)/butanol solution (10 mL, 0.02 mol/L) was carefully layered along the walls of a vial onto the aqueous phase.

The interface reaction was proceeding for 2 days at room temperature. Then, the aqueous phase was decanted and centrifuged at 12500 rad/min for 5 mins. The supernatant liquid was dropwise added to the NaHCO3/THF mixture (15 mL 1 mol/L NaHCO3 aqueous solution/45 mL THF) with rapid agitation for 1 h. When no visible gas bubbles escaped from the mixture, the mixture was allowed to continue to stir for 0.5 h and then stand for 2 h. A clear brownness solution was obtained by filtration of uppermost liquid phase (pH>8), concentrated, and precipitated in cool petroleum ether (PE). The precipitate was filtered off, dissolved in THF/water solution (5 mL, volume ratio=4/1), and the resulting solution was purified by dialysis against THF/water (volume ratio=4/1) for 2 days. Finally, the solvent was pumped out, and a brownness solid (**P5-5**, 0.05g, 50%) (or PDMA-*b*-PMA-*b*-PEDOT, 0.06 g, 60%) was obtained by drying 48 h at 30 oC in vacuo.

*P5-5 data:*

SEC: *M*n, SEC=40.6 kg/mol, *M*w, SEC=90.5 kg/mol, PDI=2.23.

FTIR (KBr, *ν*max/cm−1): 1150 (C−N), 1730 (C=O).

1H NMR (CDCl3, *δ*/ppm): 7.00 (m, 5H), 7.06 (m, 5H), 3.40−3.72 (m, 135H), 3.78−4.70 (s, 1260H), 2.51−2.62 (s, 928H).

(3)

(4)


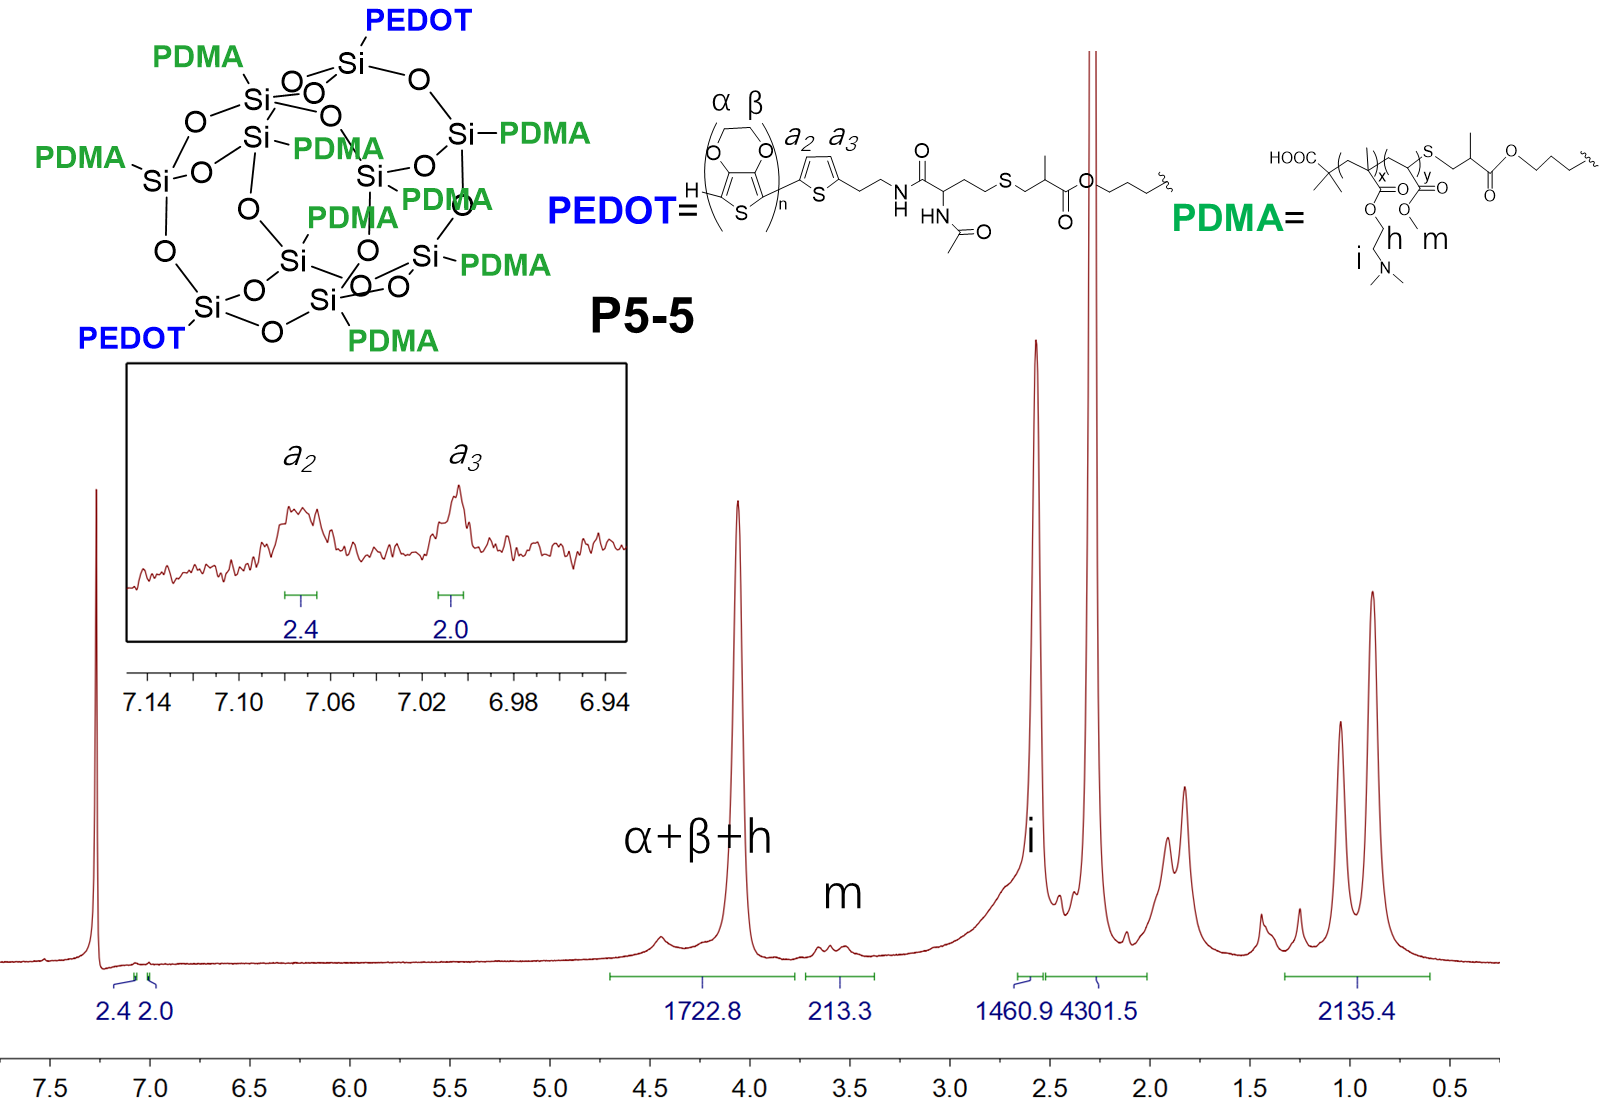


Figure S7. 1H NMR of P5-5

*PDMA-b-PMA-b-PEDOT data:*

SEC: *M*n, SEC=17.9 kg/mol, *M*w, SEC=22.4 kg/mol, PDI=1.31.

FTIR (KBr, *ν*max/cm−1): 1152 (C−N), 1728 (C=O).

1H NMR (CDCl3, *δ*/ppm): 4.42−3.78 (m, 257H), 3.56−3.67 (s, 39H), 2.52−2.78 (s, 233H), 2.30 (s, 698H), 0.72−1.09 (s, 346H).

(5)


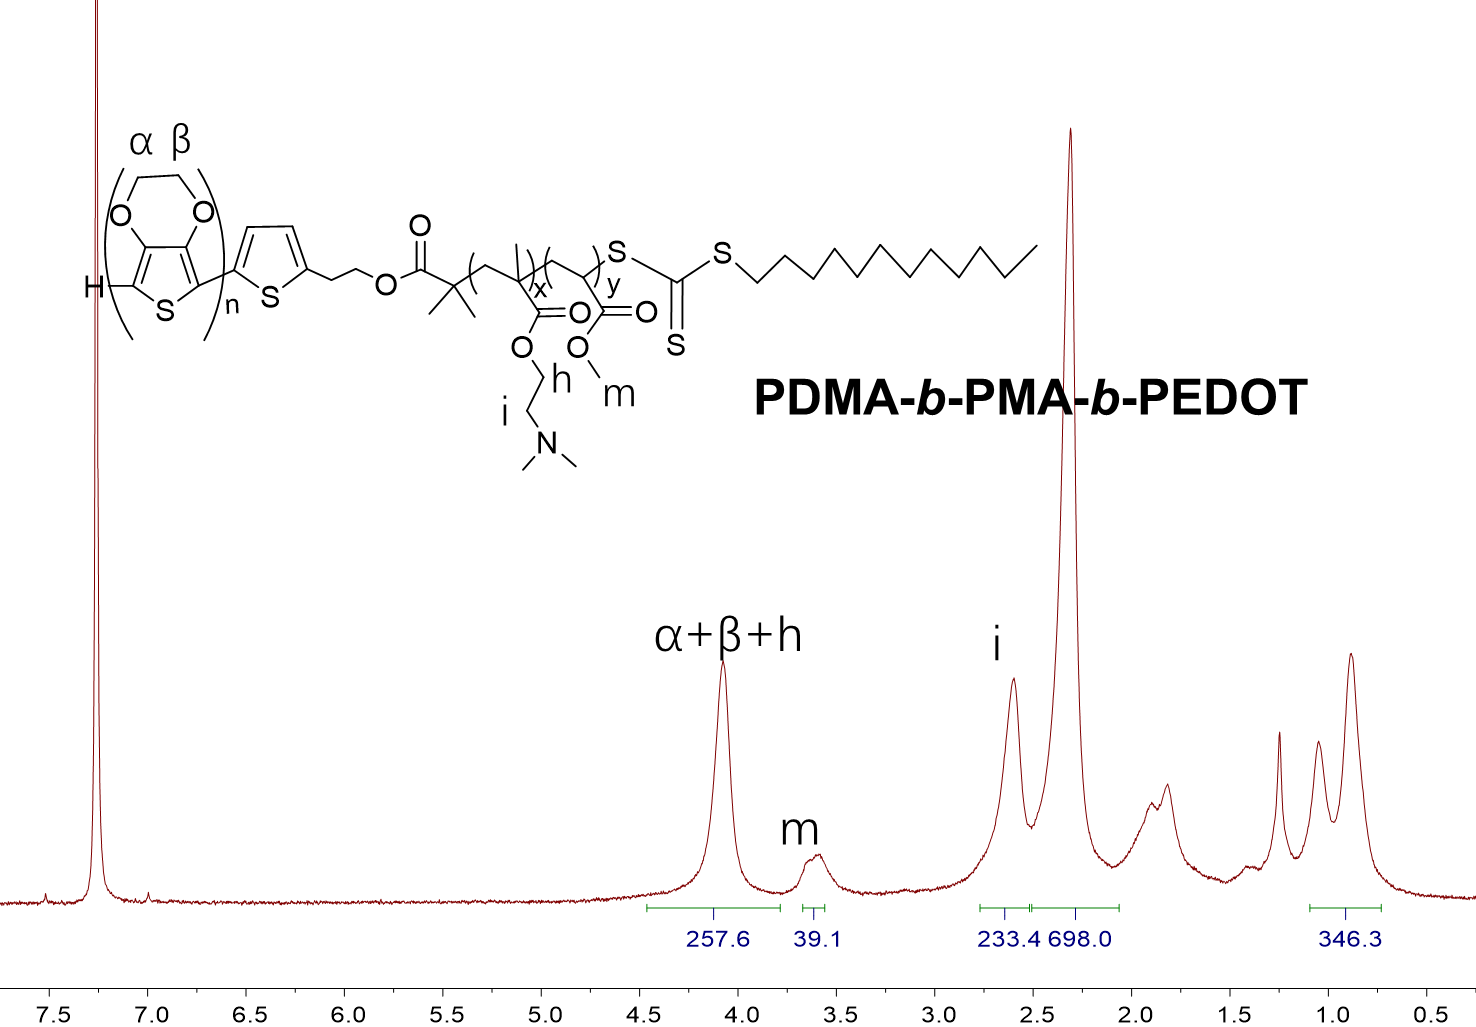


Figure S8. 1H NMR of PDMA-*b*-PMA-*b*-PEDOT

## 1.2 General Procedure for obtaining the pristine SWNTs, SWNTs dispersion, modified SWNTs and supernatant liquid

All modifiers were dissolved in THF/water solution and stirred for 24 h to ensure the system reached equilibrium (1 mg/mL, v/v=4/1). The SWNTs were treated by ultrasonication in acetone for 10 min at 180 W, rinsed with THF/water solution for several times to remove organic residues and part of inorganic impurity and dried in vacuo.

The dispersion liquid was prepared by mixing treated-SWNTs and modifier solutions with initial mass ratio of 1:1 modifier/SWNTs in a flask and then sonicated the resulting mixture for 20 min. All sonication processes were carried out with a horn sonicator. The output power was fixed at 180 W and the flask is placed in a bath of ice water during sonication to prevent the temperature rising. Then, the dispersions were centrifuged at a speed of 12500 rpm for 10 min. The modified nanotubes were obtained by washing and vacuum drying the residues. The centrifugal supernatant liquid and the washing liquid (the total volume of washing liquid was four times as much as the volume of dispersion) were merged for further testing.

## 1.3 Synthesized of PEDOT homopolymer by interfacial polymerization

The EDOT/butanol solution (10 mL, 0.012 mol/L) was carefully layered over 5mL FeCl3 solution (0.03 mol/L with 3 drops concentrated HCl), then the interface reaction was proceeding for 2 days at room temperature. Finally, the precipitate in aqueous phase was extracted, washed with water and THF for several times, dried 48h at 30 oC in vacuo.


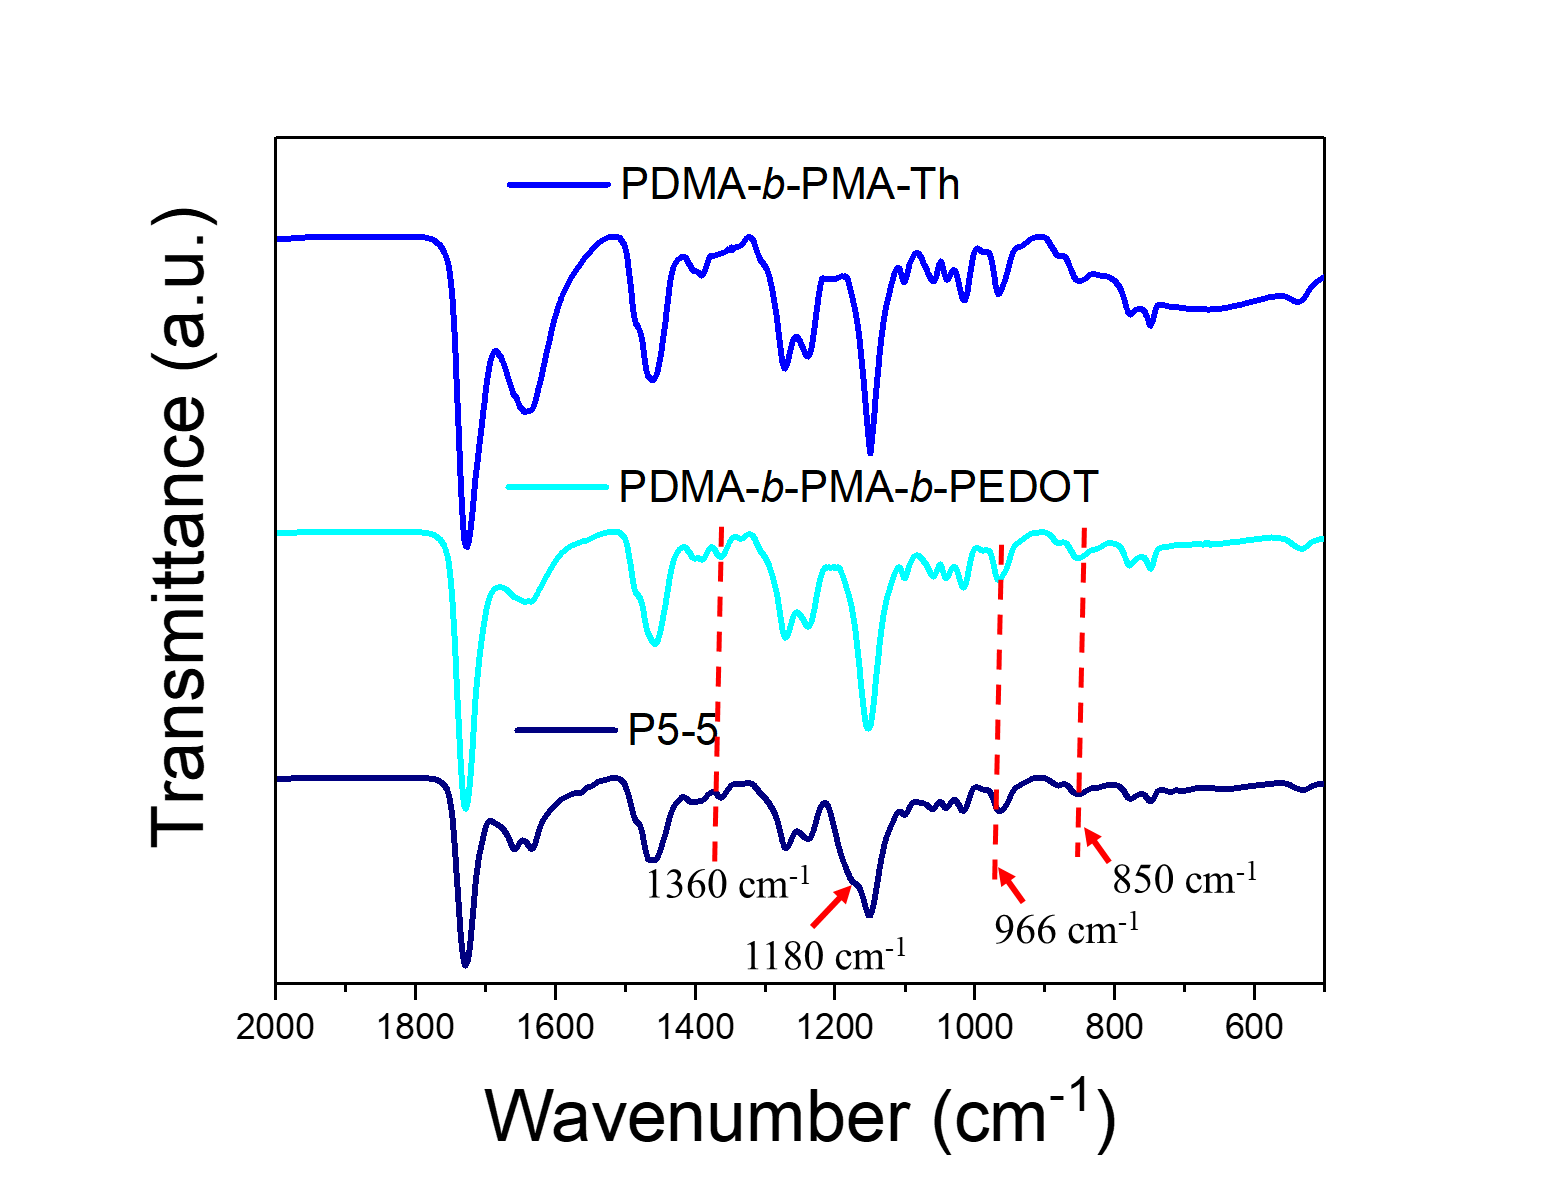


Figure S9 FTIR spectroscopy of PDMA-*b*-PMA-Th, PDMA-*b*-PMA-*b*-PEDOT and M5-5.

The absorption bands of Carbon−sulfur bonding within the thiophene ring occurred with maxima at 850, 966 and 1360 cm−1 in the spectra of PDMA-*b*-PMA-*b*-PEDOT and M5-5, which were attributed to the formation of PEDOT chains after oxidation; The band at 1360 cm−1, which indicates the existence of a quinoidal structure, was observed for all bulk PEDOT polymers [2]. The peak at 1180 cm just observed in M5-5 spectrum clearly indicated the participation of silsesquioxane, which was assigned to stretching vibration of Si−O−Si.

# 2.Additional Results





Figure S10 Absorption profiles for SWNT dispersions in an aqueous solution with modifiers. The dispersions were obtained by dispersing SWNTs in modifier THF/water solution (1 mg/mL, v/v=4/1) with initial mass ratio of 1:1 modifier/SWNTs. M1, M2, M3 denote SWNT dispersions in which SWNTs were dispersed in PDMA-*b*-PMA-Th, PDMA-*b*-PMA-*b*-PEDOT, P5-5 solution.


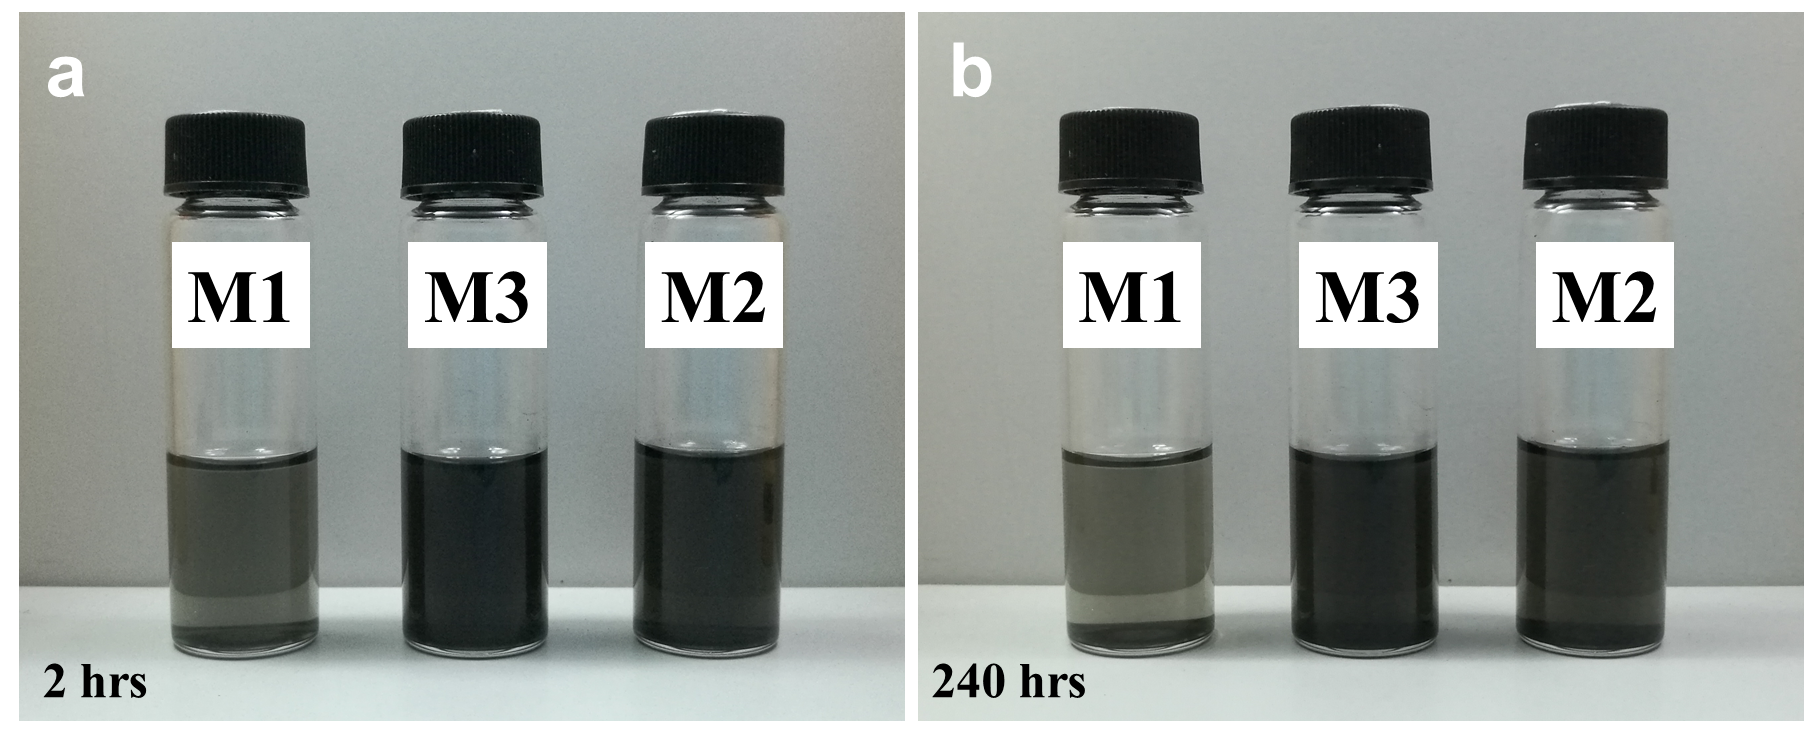


Figure S11 Digital images of SWNT dispersions. M1, M2, M3 denote SWNT dispersions in which SWNTs were dispersed in PDMA-*b*-PMA-Th, PDMA-*b*-PMA-b-PEDOT, M5-5 solution.

Figure S12 DTG curves of PDMA-*b*-PMA-Th, PDMA-*b*-PMA-*b*-PEDOT and P5-5.

Figure S13 TGA (up) and DTG (down) curves of the PEDOT homopolymer.

Figure S14 Cyclic voltammograms of PDMA-*b*-PMA-*b*-PEDOT and P5-5 at 100 mV/s.

# References

[1] J.T. Lai, D. Filla, R. Shea, Functional Polymers from Novel Carboxyl-Terminated Trithiocarbonates as Highly Efficient RAFT Agents, Macromolecules, 35 (2002) 6754-6756.

[2] Y. Xiao, J.-Y. Lin, S.-Y. Tai, S.-W. Chou, G. Yue, J. Wu, Pulse electropolymerization of high performance PEDOT/MWCNT counter electrodes for Pt-free dye-sensitized solar cells, Journal of Materials Chemistry, 22 (2012) 19919-19925.
